# Supplementary material for: Post-Traumatic Stress Disorder Among Healthcare Providers Amid the Conflict in Sudan: A Call for Immediate Policy Action
Source: Research Square preprint supplement (doi:10.21203/rs.3.rs-8604088/v1), 2026-01-21
Supplement: Supplementary file 1 [file 3c2a04dde7653ee2f149609a.docx]

**Post-Traumatic Stress Disorder Among Healthcare Providers Amid the Conflict in Sudan: A Call for Immediate Policy Action**

**Results**

Among the 528 healthcare providers, 64.4% were female, and 35.6% were male. The majority (76.7%) were aged 25-34 years, with only 3.2% aged 35 or older. Most participants were single (88.3%), and 79.2% were internally displaced due to the April 15 conflict. Gedarif and River Nile States had the highest representation (25.0% and 25.2%, respectively). A significant proportion (82.2%) had a monthly income below $100. Physicians constituted the majority (69.9%), followed by nurses (15.0%). Most worked in teaching hospitals (67.4%), and nearly half (49.8%) had less than one year of medical experience.

| Table 1: Demographic and Professional Characteristics of Healthcare Providers | |
| --- | --- |
| Characteristics | **Overall (N=528)** |
| Gender |  |
| Female | 340 (64.4%) |
| Male | 188 (35.6%) |
| Age |  |
| 18-24 | 106 (20.1%) |
| 25-34 | 405 (76.7%) |
| 35-44 | 12 (2.3%) |
| 45 and above | 5 (0.9%) |
| Marital status |  |
| Divorced or widowed | 6 (1.1%) |
| Married | 56 (10.6%) |
| Single | 466 (88.3%) |
| Current Residence |  |
| Gedarif State | 132 (25.0%) |
| Kassala State | 146 (27.7%) |
| Northern State | 62 (11.7%) |
| Red Sea State | 55 (10.4%) |
| River Nile State | 133 (25.2%) |
| internally displaced due to the April 15 conflict |  |
| Yes | 418 (79.2%) |
| No | 110 (20.8%) |
| Monthly Income |  |
| Less than $100 | 434 (82.2%) |
| $100 to $300 | 75 (14.2%) |
| $301 to $500 | 11 (2.1%) |
| Above $500 | 8 (1.5%) |
| Occupation |  |
| Physician (Doctor) | 369 (69.9%) |
| Dentist | 26 (4.9%) |
| Pharmacist | 25 (4.7%) |
| Nurse | 79 (15.0%) |
| Medical Technician | 22 (4.2%) |
| Other | 7 (1.3%) |
| Health facility type |  |
| Government Hospital | 126 (23.9%) |
| Teaching Hospital | 356 (67.4%) |
| University Hospital | 3 (0.6%) |
| Private Hospital | 29 (5.5%) |
| Health center | 14 (2.7%) |
| Medical Practice Experience |  |
| Less than one year | 263 (49.8%) |
| 1 to 5 years | 229 (43.4%) |
| 5 to 10 years | 27 (5.1%) |
| More | 9 (1.7%) |
| Working Hours During the Conflict |  |
| Slight increase (1–2 hrs/day) | 128 (24.2%) |
| Moderate increase (3–4 hrs/day) | 168 (31.8%) |
| Substantial increase (5+ hrs/day) | 159 (30.1%) |

### Exposure to Trauma and Crisis Management Training

Only 38.6% of healthcare providers received crisis management training at work, while 41.3% had training at university. A substantial proportion (76.7%) experienced multiple traumatic events during the conflict, with 37.7% encountering three or more. Additionally, 36.2% had prior trauma exposure before the conflict. Most (60.6%) reported experiencing recent trauma over three months ago. Common workplace traumas included witnessing death or severe injury (36.9%), loss of a colleague or patient (36.2%), and exposure to armed violence (31.8%). More than half (53.0%) found it difficult to handle patients or colleagues, and 71.4% provided medical care to trauma patients, primarily for physical injuries (48.7%) and psychological trauma (29.7%).

| Table 2: Exposure to Trauma and Crisis Management Training | |
| --- | --- |
| Characteristics | **Overall (N=528)** |
| Received Crisis Management Training _at work / yes | 204 (38.6%) |
| Received Crisis Management Training _at the university /yes | 218 (41.3%) |
| Count of experienced traumatic events during the conflict |  |
| One event | 206 (39.0%) |
| Three or more events | 199 (37.7%) |
| Two events | 123 (23.3%) |
| Experienced traumatic events before the conflict /yes | 191 (36.2%) |
| Recent Trauma Time |  |
| Less than 30 days ago | 118 (22.3%) |
| 30 days to 3 months ago | 90 (17.0%) |
| More than 3 months ago | 320 (60.6%) |
| Workplace Trauma Types (Check all that apply) |  |
| Exposure to armed violence | 168 (31.8%) |
| Witnessing death or severe injury. | 195 (36.9%) |
| Treating casualties from violent incidents. | 138 (26.1%) |
| Exposed to sexual assault or abuse. | 33 (6.2%) |
| Loss of a colleague or patient | 191 (36.2%) |
| Physical assault, Threats of violence, Armed attacks | 70 (13.3%) |
| Exposure to hazardous | 71 (13.4%) |
| Handling cases of sexual assault or abuse | 74 (14.0%) |
| Experiencing personal threats to your safety from patients or visitors | 90 (17.0%) |
| Other | 90 (17.0%) |
| Difficulty Handling Patients or Colleagues during the Conflict / yes | 280 (53.0%) |
| Provided medical care to traumatic patients during the conflict / yes | 377 (71.4%) |
| Types of trauma provided medical care or trauma attended (select all that apply) |  |
| Physical injuries | 257 (48.7%) |
| Psychological trauma | 157 (29.7%) |
| Sexual or gender-based violence-related trauma | 74 (14.0%) |
| Grief and bereavement-related trauma | 87 (16.5%) |
| Other | 58 (11.0%) |

### Psychological Impact of Trauma Based on the Impact of Events Scale-Revised

The most commonly reported PTSD symptoms included intentional avoidance of thoughts about the trauma (mean = 1.69, SD = 1.38), difficulty controlling intrusive thoughts (mean = 1.65, SD = 1.30), and increased irritability or anger (mean = 1.63, SD = 1.26). Avoidance behaviors such as suppressing emotions (mean = 1.55, SD = 1.18) and staying away from reminders (mean = 1.36, SD = 1.26) were also prevalent. Hypervigilance (mean = 1.31, SD = 1.29) and trouble sleeping (mean = 1.18, SD = 1.26) were frequently reported. Physical reactions to reminders were less common (mean = 0.87, SD = 1.14), but many participants struggled with concentration (mean = 1.34, SD = 1.22) and emotional numbness (mean = 1.34, SD = 1.21).

| **Table 3: Psychological Impact of Trauma Based on the Impact of Events Scale-Revised** | | | | | |
| --- | --- | --- | --- | --- | --- |
| **Questions** | | **Mean** | | **SD** | |
| Any reminder brought back feelings about it |  | 1.420 |  | 1.17 |  |
| I had trouble staying asleep |  | 1.119 |  | 1.17 |  |
| Other things kept making me think about it |  | 1.341 |  | 1.14 |  |
| I felt irritable and angry |  | 1.625 |  | 1.26 |  |
| I avoided letting myself get upset when I thought about it or was reminded of it |  | 1.551 |  | 1.18 |  |
| I thought about it when I didn't mean to |  | 1.407 |  | 1.16 |  |
| I felt as if it hadn't happened or wasn't real |  | 1.343 |  | 1.33 |  |
| I stayed away from reminders about it |  | 1.358 |  | 1.26 |  |
| Pictures about it popped into my mind |  | 1.330 |  | 1.16 |  |
| I was jumpy and easily startled |  | 1.314 |  | 1.25 |  |
| I tried not to think about it |  | 1.650 |  | 1.30 |  |
| I was aware that I still had a lot of feelings about it, but I didn't deal with them |  | 1.519 |  | 1.24 |  |
| My feelings about it were kind of numb |  | 1.335 |  | 1.21 |  |
| I found myself acting or feeling as though I was back at that time |  | 1.170 |  | 1.18 |  |
| I had trouble falling asleep |  | 1.180 |  | 1.26 |  |
| I had waves of strong feelings about it |  | 1.337 |  | 1.18 |  |
| I tried to remove it from my memory |  | 1.688 |  | 1.38 |  |
| I had trouble concentrating |  | 1.335 |  | 1.22 |  |
| Reminders of it caused me to have physical reactions, such as sweating, trouble breathing, nausea, or a pounding heart |  | 0.871 |  | 1.14 |  |
| I had dreams about it |  | 1.222 |  | 1.19 |  |
| I felt watchful or on-guard |  | 1.309 |  | 1.29 |  |
| I tried not to talk about it |  | 1.436 |  | 1.32 |  |
|  | | | | | |

### Prevalence and Severity of PTSD Among Healthcare Providers

The mean IES-R score was 29.9 (SD = 16.7), ranging from 0 to 85. PTSD was identified in 43.2% of participants, with 35.4% experiencing severe symptoms. Among symptom clusters, avoidance had the highest mean score (11.9 ± 6.9), followed by intrusion (10.3 ± 6.4) and hyperarousal (7.6 ± 5.2). While 38.1% had normal stress levels, 18.8% had mild PTSD, 7.8% had moderate PTSD, and over one-third (35.4%) suffered from severe PTSD.

| Table 4: Prevalence and Severity of PTSD Among Healthcare Providers | |
| --- | --- |
| Characteristics | **Overall (N=528)** |
| Total IES-R Score |  |
| Mean (SD) | 29.9 (16.7) |
| Range | 0.0 - 85.0 |
| IES-R Classification |  |
| No PTSD | 300 (56.8%) |
| PTSD | 228 (43.2%) |
| PTSD Severity |  |
| Normal | 201 (38.1%) |
| Mild | 99 (18.8%) |
| Moderate | 41 (7.8%) |
| Severe | 187 (35.4%) |
| Intrusion |  |
| Mean (SD) | 10.3 (6.4) |
| Range | 0.0 - 31.0 |
| Avoidance |  |
| Mean (SD) | 11.9 (6.9) |
| Range | 0.0 - 32.0 |
| Hyper-arousal |  |
| Mean (SD) | 7.6 (5.2) |
| Range | 0.0 - 24.0 |

###

### Coping Mechanisms Among Healthcare Providers

Among coping strategies, seeking comfort in religion or spiritual beliefs had the highest mean score (2.70 ± 1.08), followed by acceptance (2.57 ± 1.07) and learning to live with the situation (2.58 ± 1.06). Active coping strategies, such as taking action to improve the situation (2.40 ± 1.06) and looking for something positive (2.35 ± 1.00), were commonly reported. Conversely, maladaptive coping mechanisms, including substance use (1.41 ± 0.77) and self-blame (1.78 ± 0.94), were less frequently utilized.

| **Table 5: Coping Mechanisms Among Healthcare Providers** | | | | | |
| --- | --- | --- | --- | --- | --- |
| **Questions** | | **Mean** | | **SD** | |
| I’ve been turning to work or other activities to take my mind off things. |  | 2.22 |  | 1.052 |  |
| I’ve been concentrating my efforts on doing something about the situation. |  | 2.08 |  | 0.959 |  |
| I’ve been telling myself "This isn’t real." |  | 1.80 |  | 0.960 |  |
| I’ve been using alcohol or other drugs to make myself feel better. |  | 1.41 |  | 0.791 |  |
| I’ve been getting emotional support from others. |  | 2.13 |  | 1.026 |  |
| I’ve been giving up trying to deal with it. |  | 1.88 |  | 0.955 |  |
| I’ve been taking action to try to make the situation better. |  | 2.40 |  | 1.062 |  |
| I’ve been refusing to believe that it has happened. |  | 1.78 |  | 0.959 |  |
| I’ve been letting my unpleasant feelings out. |  | 2.00 |  | 0.936 |  |
| I’ve been getting help and advice from other people. |  | 1.98 |  | 0.962 |  |
| I’ve been using alcohol or other drugs to get through it. |  | 1.41 |  | 0.772 |  |
| I’ve been trying to see it in a different, more positive light. |  | 2.21 |  | 0.979 |  |
| I’ve been criticizing myself. |  | 1.79 |  | 0.939 |  |
| I’ve been coming up with strategies about what to do. |  | 2.37 |  | 1.021 |  |
| I’ve been getting comfort and understanding from someone. |  | 2.14 |  | 0.972 |  |
| I’ve been giving up the attempt to cope. |  | 1.93 |  | 0.939 |  |
| I’ve been looking for something good in what is happening. |  | 2.35 |  | 1.001 |  |
| I’ve been making jokes about it. |  | 2.00 |  | 1.008 |  |
| I’ve been doing something to think about it less, such as watching TV or reading. |  | 2.20 |  | 1.026 |  |
| I’ve been accepting the reality of the situation. |  | 2.57 |  | 1.073 |  |
| I’ve been expressing my negative feelings. |  | 2.11 |  | 0.938 |  |
| I’ve been seeking comfort in my religion or spiritual beliefs. |  | 2.69 |  | 1.128 |  |
| I’ve been trying to get advice from others about what to do. |  | 2.05 |  | 0.988 |  |
| I’ve been learning to live with the situation. |  | 2.58 |  | 1.061 |  |
| I’ve been thinking hard about what steps to take. |  | 2.48 |  | 1.036 |  |
| I’ve been blaming myself for things that happened. |  | 1.78 |  | 0.938 |  |
| I’ve been praying or meditating. I seek comfort through religious or spiritual practices like praying to help me cope with my emotions. |  | 2.70 |  | 1.084 |  |
| I’ve been making fun of the situation. |  | 1.95 |  | 1.028 |  |
|  | | | | | |

###

### Coping Strategies Domains

Acceptance (5.15 ± 1.89) and religious coping (5.39 ± 1.95) were the most frequently used strategies. Planning (4.85 ± 1.74) and positive reframing (4.56 ± 1.68) also had high mean scores, indicating proactive coping approaches. In contrast, substance use (2.82 ± 1.42) and denial (3.58 ± 1.69) were among the least utilized coping mechanisms.

| **Table 6: Coping Strategies Domains** | | | | | |
| --- | --- | --- | --- | --- | --- |
| **Characteristics** | | **Mean** | | **SD** | |
| Self-distraction |  | 4.42 |  | 1.74 |  |
| Active coping |  | 4.48 |  | 1.68 |  |
| Denial |  | 3.58 |  | 1.69 |  |
| Substance use |  | 2.82 |  | 1.42 |  |
| Use of emotional support |  | 4.27 |  | 1.73 |  |
| Use of instrumental support |  | 4.03 |  | 1.69 |  |
| Behavioral disengagement |  | 3.81 |  | 1.52 |  |
| Venting |  | 4.10 |  | 1.48 |  |
| Positive reframing |  | 4.56 |  | 1.68 |  |
| Planning |  | 4.85 |  | 1.74 |  |
| Humor |  | 3.95 |  | 1.81 |  |
| Acceptance |  | 5.15 |  | 1.89 |  |
| Religion |  | 5.39 |  | 1.95 |  |
| Self-blame |  | 3.56 |  | 1.61 |  |
|  | | | | | |

###

### Employer Support and Training in Mental Health During Conflict

Employer support during the conflict varied, with 23.9% of healthcare providers feeling not at all supported, while only 6.8% felt very supported. Mental health service access was reported by 34.1% of participants. Formal training on managing the psychological impact of conflict during university was received by 36.2%, while workplace training from the Federal Ministry of Health or hospitals was reported by 12.1%. Training from NGOs (3.2%) and specialized workshops (11.6%) were less common. Among those trained, 45.8% found it very effective. A significant majority (86.6%) expressed the need for additional training to better handle mental health challenges.

| Table 7: Employer Support and Training on Mental Health During Conflict | |
| --- | --- |
| Characteristics | **Overall (N=528)** |
| How supported do you feel by your employer during the conflict? |  |
| Not at all supported | 126 (23.9%) |
| Somewhat supported | 132 (25.0%) |
| Neutral | 142 (26.9%) |
| Supported | 92 (17.4%) |
| Very supported | 36 (6.8%) |
| Do you have access to mental health services during the conflict /yes | 180 (34.1%) |
| Have you received formal training on how to manage the psychological impact of conflict on patients and healthcare providers during your university studies? /yes | 191 (36.2%) |
| Have you received formal training on managing the psychological impact of conflict on patients, healthcare providers, or yourself? |  |
| Yes, from the Federal Ministry of Health or my hospital as part of workplace training | 64 (12.1%) |
| Yes, through humanitarian organizations, NGOs, or other institutions | 17 (3.2%) |
| Yes, through specialized workshops or certification programs. | 61 (11.6%) |
| How effective do you think this training was in preparing you to manage mental health challenges caused by conflict? |  |
| Not effective at all | 2 (1.4%) |
| Not very effective | 3 (2.1%) |
| Neutral | 36 (25.4%) |
| Somewhat effective | 36 (25.4%) |
| Very effective | 65 (45.8%) |
| Do you believe you need additional training to better handle the mental health effects of conflict on patients and yourself? /YES | 123 (86.6%) |

### Awareness and Utilization of Online Mental Health Services

More than half (52.6%) of participants were unaware of online mental health services, while 18.4% had used them. Among users, live video therapy (7.8%) and chat-based therapy (4.7%) were the most utilized options. Barriers to online services included preference for in-person therapy (12.3%), unreliable internet access (7.8%), and privacy concerns (5.7%). Notably, 64.6% of respondents indicated they would consider using online PTSD treatment if it were free, with the most preferred formats being live video therapy (15.0%) and chat-based therapy (14.4%).

| Table 8: Awareness and Utilization of Online Mental Health Services | |
| --- | --- |
| Characteristics | **Overall (N=528)** |
| Are you aware of any online mental health services available for healthcare providers affected by the conflict? |  |
| No, I am not aware of them. | 257 (52.6%) |
| Yes, and I have used them. | 90 (18.4%) |
| Yes, but I have not used them. | 142 (29.0%) |
| What type of online PTSD treatment have you used? (Select all that apply) |  |
| Live video therapy with a psychologist | 41 (7.8%) |
| Chat-based or text therapy | 25 (4.7%) |
| Pre-recorded self-help programs | 22 (4.2%) |
| Mobile apps for PTSD management | 18 (3.4%) |
| Virtual group therapy sessions | 9 (1.7%) |
| Other | 22 (4.2%) |
| Why have you not used online mental health services? (Select all that apply) |  |
| I don't know where to find these services | 23 (4.4%) |
| I don't trust online mental health professionals | 35 (6.6%) |
| I prefer in-person therapy. | 65 (12.3%) |
| Internet access is unreliable. | 41 (7.8%) |
| Concerns about privacy and confidentiality. | 30 (5.7%) |
| Cost of online therapy. | 14 (2.7%) |
| Other | 26 (4.9%) |
| If online PTSD treatment were available for free, would you consider using it?/ yes | **166 (64.6%)** |
| If you were to use an online PTSD treatment, which format would you prefer? |  |
| Live video therapy sessions with a psychologist | 79 (15.0%) |
| Chat-based or text therapy | 76 (14.4%) |
| Pre-recorded self-help programs | 36 (6.8%) |
| Mobile apps for PTSD management | 45 (8.5%) |
| Virtual group therapy sessions | 55 (10.4%) |

###

### Demographic and Occupational Factors Associated with PTSD

Age distribution was significantly associated with PTSD (p=0.0191p = 0.0191p=0.0191), with no cases reported in the 35-44 age group. Gender differences approached significance (p=0.0621p = 0.0621p=0.0621), with PTSD being more common among females (68.9%) than males (31.1%). Marital status, current residence, displacement due to conflict, occupation, health facility type, and monthly income did not show significant associations with PTSD. However, medical practice experience was significantly related to PTSD (p=0.0321p = 0.0321p=0.0321), with a higher prevalence among those with 1 to 5 years of experience (49.1%) compared to those with less than one year (46.5%) or more than five years (4.4%). Crisis management training at work (p=0.8441p = 0.8441p=0.8441) and at university (p=0.3851p = 0.3851p=0.3851) did not show a significant impact on PTSD prevalence.

| Table 9: Demographic and Occupational Factors Associated with PTSD | | | | |
| --- | --- | --- | --- | --- |
| Characteristics | **No PTSD (N=300)** | **PTSD (N=228)** | **Total (N=528)** | **p-value** |
| Age |  |  |  | 0.0191 |
| 18-24 | 58.0 (19.3%) | 48.0 (21.1%) | 106.0 (20.1%) |  |
| 25-34 | 228.0 (76.0%) | 177.0 (77.6%) | 405.0 (76.7%) |  |
| 35-44 | 12.0 (4.0%) | 0.0 (0.0%) | 12.0 (2.3%) |  |
| 45 and above | 2.0 (0.7%) | 3.0 (1.3%) | 5.0 (0.9%) |  |
| Gender |  |  |  | 0.0621 |
| Female | 183.0 (61.0%) | 157.0 (68.9%) | 340.0 (64.4%) |  |
| Male | 117.0 (39.0%) | 71.0 (31.1%) | 188.0 (35.6%) |  |
| Marital status |  |  |  | 0.7221 |
| Divorced or widowed | 4.0 (1.3%) | 2.0 (0.9%) | 6.0 (1.1%) |  |
| Married | 34.0 (11.3%) | 22.0 (9.6%) | 56.0 (10.6%) |  |
| Single | 262.0 (87.3%) | 204.0 (89.5%) | 466.0 (88.3%) |  |
| Current Residence |  |  |  | 0.2291 |
| Gedarif State | 76.0 (25.3%) | 56.0 (24.6%) | 132.0 (25.0%) |  |
| Kassala State | 93.0 (31.0%) | 53.0 (23.2%) | 146.0 (27.7%) |  |
| Northern State | 34.0 (11.3%) | 28.0 (12.3%) | 62.0 (11.7%) |  |
| Red Sea State | 26.0 (8.7%) | 29.0 (12.7%) | 55.0 (10.4%) |  |
| River Nile State | 71.0 (23.7%) | 62.0 (27.2%) | 133.0 (25.2%) |  |
| internally displaced due to the April 15 conflict |  |  |  | 0.3301 |
| Yes | 233.0 (77.7%) | 185.0 (81.1%) | 418.0 (79.2%) |  |
| No | 67.0 (22.3%) | 43.0 (18.9%) | 110.0 (20.8%) |  |
| Occupation |  |  |  | 0.3911 |
| Physician (Doctor) | 204.0 (68.0%) | 165.0 (72.4%) | 369.0 (69.9%) |  |
| Dentist | 13.0 (4.3%) | 13.0 (5.7%) | 26.0 (4.9%) |  |
| Pharmacist | 14.0 (4.7%) | 11.0 (4.8%) | 25.0 (4.7%) |  |
| Nurse | 51.0 (17.0%) | 28.0 (12.3%) | 79.0 (15.0%) |  |
| Medical Technician | 12.0 (4.0%) | 10.0 (4.4%) | 22.0 (4.2%) |  |
| Other | 6.0 (2.0%) | 1.0 (0.4%) | 7.0 (1.3%) |  |
| Medical Practice Experience |  |  |  | 0.0321 |
| Less than one year | 157.0 (52.3%) | 106.0 (46.5%) | 263.0 (49.8%) |  |
| 1 to 5 years | 117.0 (39.0%) | 112.0 (49.1%) | 229.0 (43.4%) |  |
| 5 to 10 years | 21.0 (7.0%) | 6.0 (2.6%) | 27.0 (5.1%) |  |
| More | 5.0 (1.7%) | 4.0 (1.8%) | 9.0 (1.7%) |  |
| Health facility type |  |  |  | 0.5761 |
| Government Hospital | 74.0 (24.7%) | 52.0 (22.8%) | 126.0 (23.9%) |  |
| Teaching Hospital | 199.0 (66.3%) | 157.0 (68.9%) | 356.0 (67.4%) |  |
| University Hospital | 3.0 (1.0%) | 0.0 (0.0%) | 3.0 (0.6%) |  |
| Private Hospital | 17.0 (5.7%) | 12.0 (5.3%) | 29.0 (5.5%) |  |
| Health center | 7.0 (2.3%) | 7.0 (3.1%) | 14.0 (2.7%) |  |
| Monthly Income |  |  |  | 0.0821 |
| Less than $100 | 246.0 (82.0%) | 188.0 (82.5%) | 434.0 (82.2%) |  |
| $100 to $300 | 48.0 (16.0%) | 27.0 (11.8%) | 75.0 (14.2%) |  |
| $301 to $500 | 3.0 (1.0%) | 8.0 (3.5%) | 11.0 (2.1%) |  |
| Above $500 | 3.0 (1.0%) | 5.0 (2.2%) | 8.0 (1.5%) |  |
| Received Crisis Management Training _at work |  |  |  | 0.8441 |
| Yes | 117.0 (39.0%) | 87.0 (38.2%) | 204.0 (38.6%) |  |
| No | 183.0 (61.0%) | 141.0 (61.8%) | 324.0 (61.4%) |  |
| Received Crisis Management Training _at the university |  |  |  | 0.3851 |
| Yes | 119.0 (39.7%) | 99.0 (43.4%) | 218.0 (41.3%) |  |
| No | 181.0 (60.3%) | 129.0 (56.6%) | 310.0 (58.7%) |  |
| Working Hours During Conflict |  |  |  | 0.0051 |
| No change | 63 (21.0%) | 10 (4.4%) | 128 (24.2%) |  |
| Slight increase (1–2 hrs) | 87 (29.0%) | 41 (18.0%) | 168 (31.8%) |  |
| Moderate increase (3–4 hrs) | 86 (28.7%) | 82 (36.0%) | 159 (30.1%) |  |
| Substantial increase (5+ hrs) | 64 (21.3%) | 95 (41.7%) | 128 (24.2%) |  |

 1. Pearson's Chi-squared test

### Logistic Regression Model for PTSD

Among the predictors analyzed, witnessing death or severe injury was significantly associated with PTSD (p=0.001p = 0.001p=0.001), with an odds ratio (OR) of 1.931 (95% CI: 1.301–2.868). Exposure to hazardous conditions also showed a significant association (p=0.008p = 0.008p=0.008), increasing the odds of PTSD by more than twofold (OR = 2.168, 95% CI: 1.226–3.835). Other factors, including prior traumatic experiences (p=0.129p = 0.129p=0.129), exposure to armed violence (p=0.096p = 0.096p=0.096), and internal displacement (p=0.516p = 0.516p=0.516), did not show statistically significant associations with PTSD. Treating casualties from violent incidents, experiencing personal threats, and handling sexual assault cases were also not significantly linked to PTSD.

| Table 10: Logistic Regression Model for PTSD - IES-R Classification | | | | | | | | | | | | | | | |
| --- | --- | --- | --- | --- | --- | --- | --- | --- | --- | --- | --- | --- | --- | --- | --- |
|  | | | | | | | | | | | | **95% Confidence Interval** | | | |
| **Predictor** | | **Estimate** | | **SE** | | **Z** | | **p** | | **Odds ratio** | | **Lower** | | **Upper** | |
| Intercept |  | -0.8685 |  | 0.170 |  | -5.1187 |  | < .001 |  | 0.420 |  | 0.301 |  | 0.585 |  |
| Experienced traumatic events before the conflict: |  |  |  |  |  |  |  |  |  |  |  |  |  |  |  |
| Yes – No |  | 0.2920 |  | 0.192 |  | 1.5196 |  | 0.129 |  | 1.339 |  | 0.919 |  | 1.952 |  |
| Exposure to armed violence: |  |  |  |  |  |  |  |  |  |  |  |  |  |  |  |
| yes – no |  | 0.3503 |  | 0.210 |  | 1.6659 |  | 0.096 |  | 1.419 |  | 0.940 |  | 2.143 |  |
| Witnessing death or severe injury.: |  |  |  |  |  |  |  |  |  |  |  |  |  |  |  |
| yes – no |  | 0.6582 |  | 0.202 |  | 3.2625 |  | 0.001 |  | 1.931 |  | 1.301 |  | 2.868 |  |
| Treating casualties from violent incidents.: |  |  |  |  |  |  |  |  |  |  |  |  |  |  |  |
| yes – no |  | 0.0188 |  | 0.239 |  | 0.0789 |  | 0.937 |  | 1.019 |  | 0.638 |  | 1.627 |  |
| Exposed to sexual assault or abuse.: |  |  |  |  |  |  |  |  |  |  |  |  |  |  |  |
| yes – no |  | 0.3868 |  | 0.417 |  | 0.9271 |  | 0.354 |  | 1.472 |  | 0.650 |  | 3.335 |  |
| Loss of a colleague or patient: |  |  |  |  |  |  |  |  |  |  |  |  |  |  |  |
| yes – no |  | 0.1041 |  | 0.207 |  | 0.5036 |  | 0.615 |  | 1.110 |  | 0.740 |  | 1.664 |  |
| Physical assault, Threats of violence, Armed attacks: |  |  |  |  |  |  |  |  |  |  |  |  |  |  |  |
| yes – no |  | 0.0926 |  | 0.331 |  | 0.2796 |  | 0.780 |  | 1.097 |  | 0.573 |  | 2.099 |  |
| Internal displacement: |  |  |  |  |  |  |  |  |  |  |  |  |  |  |  |
| yes – no |  | -0.1322 |  | 0.203 |  | -0.6502 |  | 0.516 |  | 0.876 |  | 0.588 |  | 1.305 |  |
| Exposure to hazardous: |  |  |  |  |  |  |  |  |  |  |  |  |  |  |  |
| yes – no |  | 0.7739 |  | 0.291 |  | 2.6597 |  | 0.008 |  | 2.168 |  | 1.226 |  | 3.835 |  |
| Handling cases of sexual assault or abuse: |  |  |  |  |  |  |  |  |  |  |  |  |  |  |  |
| yes – no |  | 0.3241 |  | 0.297 |  | 1.0894 |  | 0.276 |  | 1.383 |  | 0.772 |  | 2.477 |  |
| Experiencing personal threats to your safety from patients or visitors: |  |  |  |  |  |  |  |  |  |  |  |  |  |  |  |
| yes – no |  | -0.2762 |  | 0.264 |  | -1.0450 |  | 0.296 |  | 0.759 |  | 0.452 |  | 1.274 |  |
| Note. Estimates represent the log odds of "IES-R Classification = PTSD" vs. "IES-R Classification = No PTSD" | | | | | | | | | | | | | | | |

### Correlation Matrix for PTSD-Related Factors and Coping Strategies

The table demonstrates significant positive correlations between various coping strategies and PTSD symptom dimensions (IES-R Total, Intrusion, Avoidance, Hyper-arousal). Self-distraction showed strong correlations with all PTSD subscales (ranging from 0.422 to 0.503, P<0.05). Denial also exhibited substantial correlations across the dimensions (ranging from 0.433 to 0.504, p<0.05p). Behavioral disengagement and self-blame demonstrated similar patterns, with correlations ranging from 0.421 to 0.478, all statistically significant. Other coping mechanisms such as substance use, venting, and use of emotional support had moderate correlations with PTSD subscales, especially with Intrusion and Hyper-arousal. Positive reframing and humor showed weaker correlations, though still significant (p<0.5).

| Table 11: Correlation Matrix for PTSD-Related Factors and Coping Strategies | | | | |
| --- | --- | --- | --- | --- |
| Variable | **IES-R Total** | **Intrusion** | **Avoidance** | **Hyper-arousal** |
| Self-distraction | 0.503* | 0.442* | 0.489* | 0.422* |
| Active coping | 0.299* | 0.247* | 0.306* | 0.249* |
| Denial | 0.504* | 0.472* | 0.433* | 0.462* |
| Substance use | 0.219* | 0.194* | 0.143* | 0.274* |
| Use of emotional support | 0.305* | 0.267* | 0.295* | 0.256* |
| Use of instrumental support | 0.291* | 0.229* | 0.317* | 0.231* |
| Behavioral disengagement | 0.478* | 0.421* | 0.440* | 0.431* |
| Venting | 0.429* | 0.394* | 0.367* | 0.405* |
| Positive reframing | 0.277* | 0.233* | 0.276* | 0.236* |
| Planning | 0.314* | 0.270* | 0.319* | 0.250* |
| Humor | 0.256* | 0.232* | 0.223* | 0.240* |
| Acceptance | 0.194* | 0.143* | 0.225* | 0.150* |
| Religion | 0.287* | 0.235* | 0.320* | 0.207* |
| Self-blame | 0.485* | 0.442* | 0.403* | 0.476* |
| * Significance levels: p < .05 | | | | |
